# Supplementary figures and images for: A highly durable catalyst system for hydrogen production from dimethyl ether
Source: Royal Society of Chemistry journal article supplement (doi:10.1039/d4se00059e), 2024-01-01

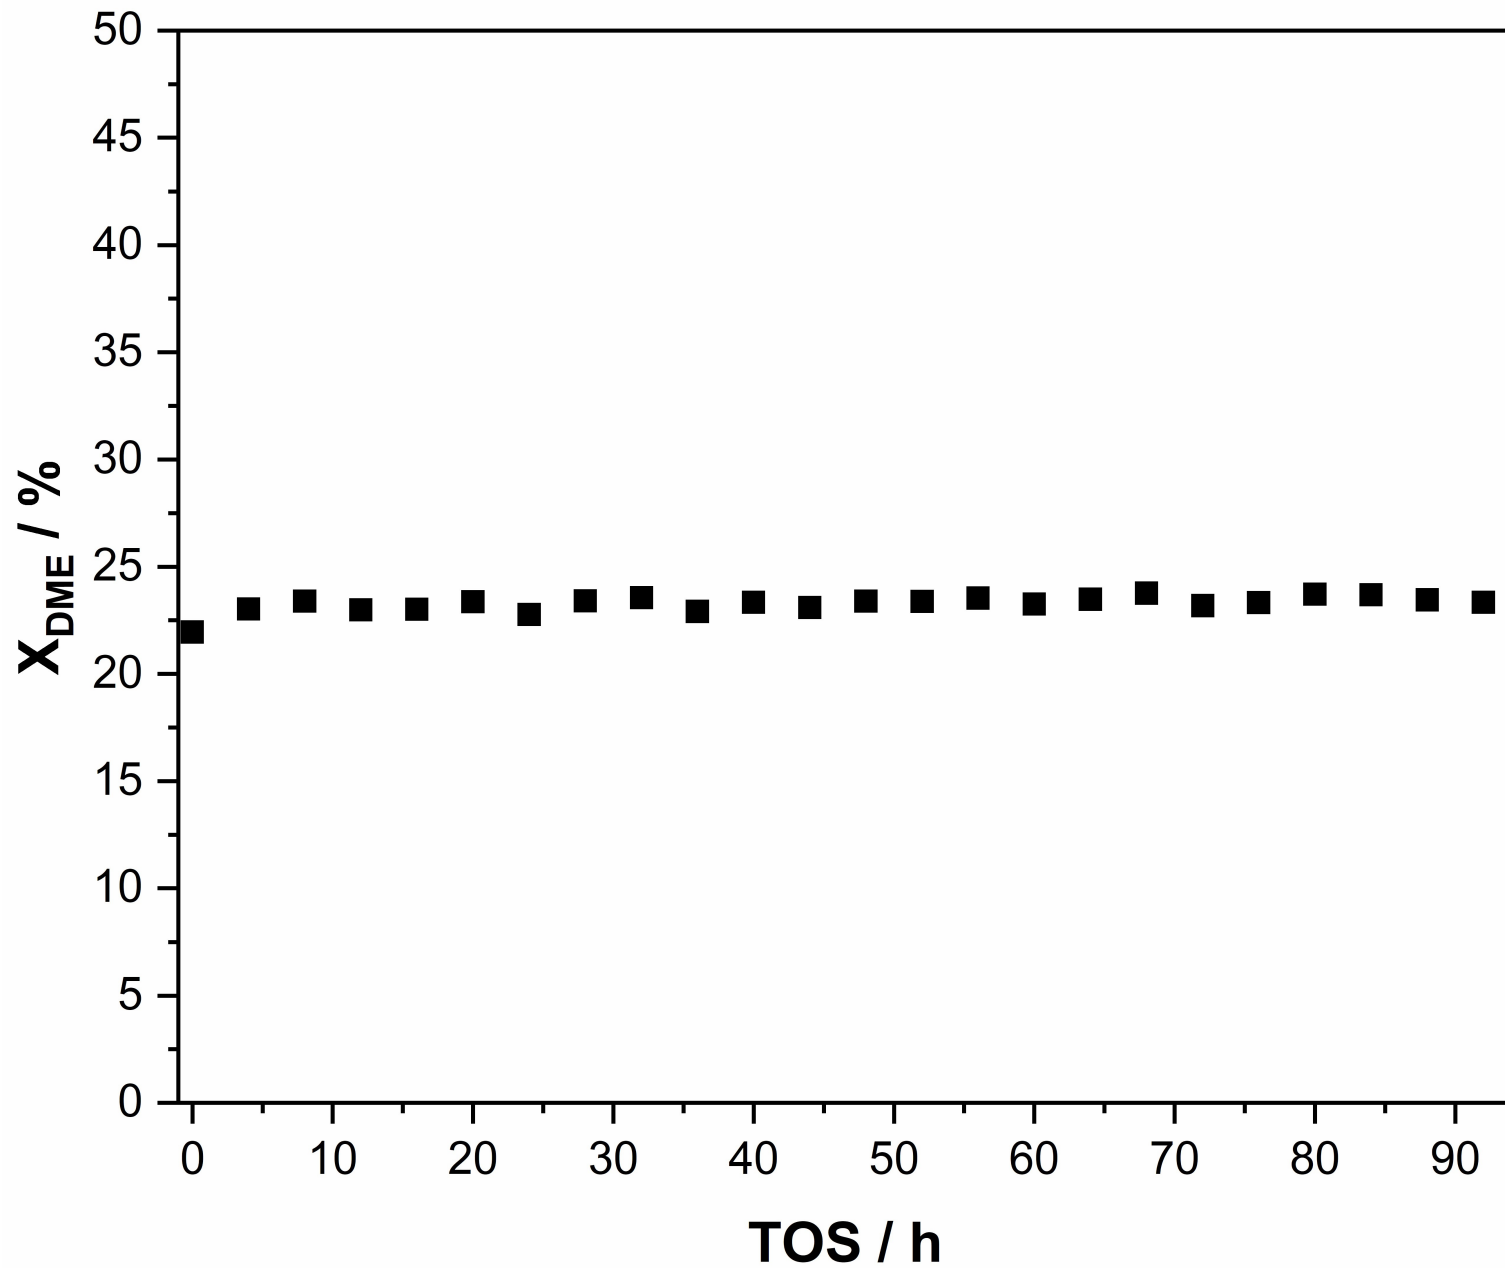

Supplement: d4se00059e10.pdf [file d4se00059e10.pdf]

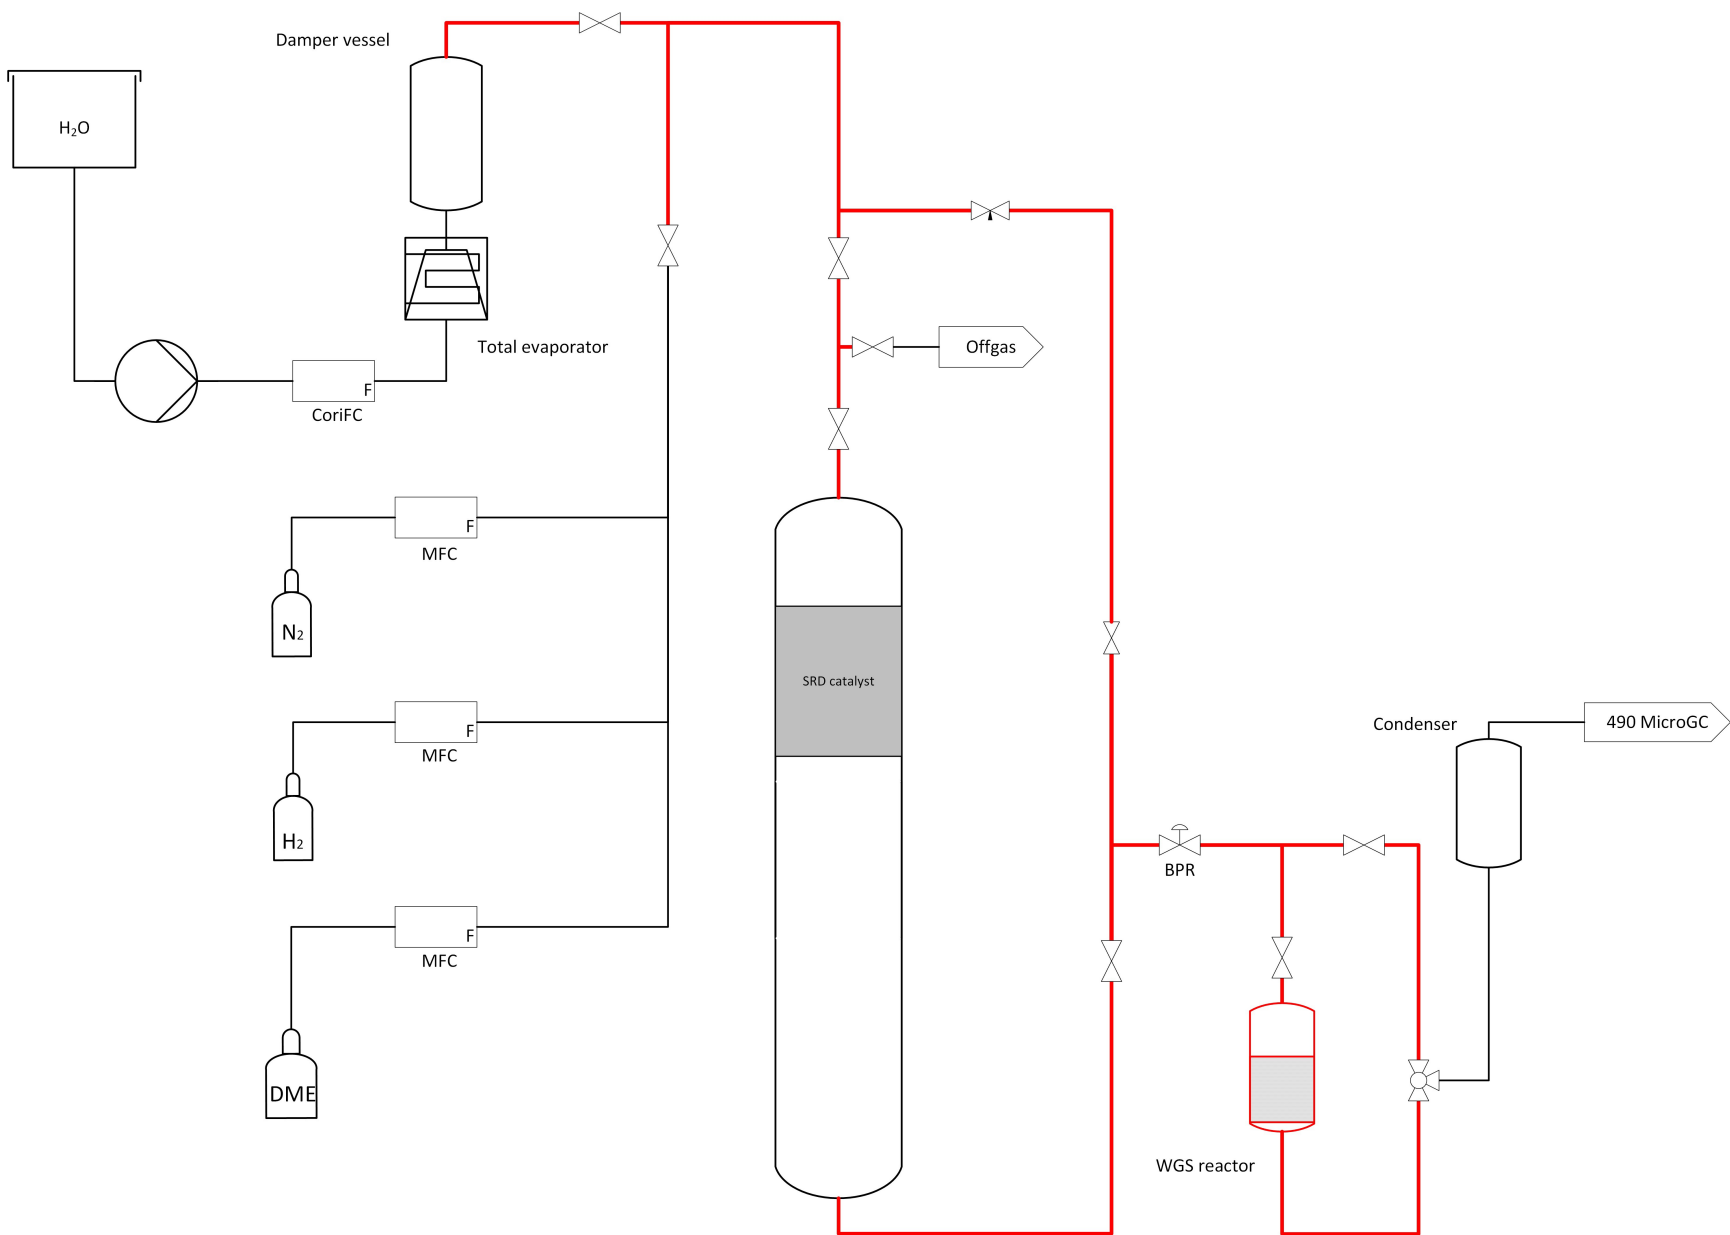

Supplement: d4se00059e2.pdf [file d4se00059e2.pdf]

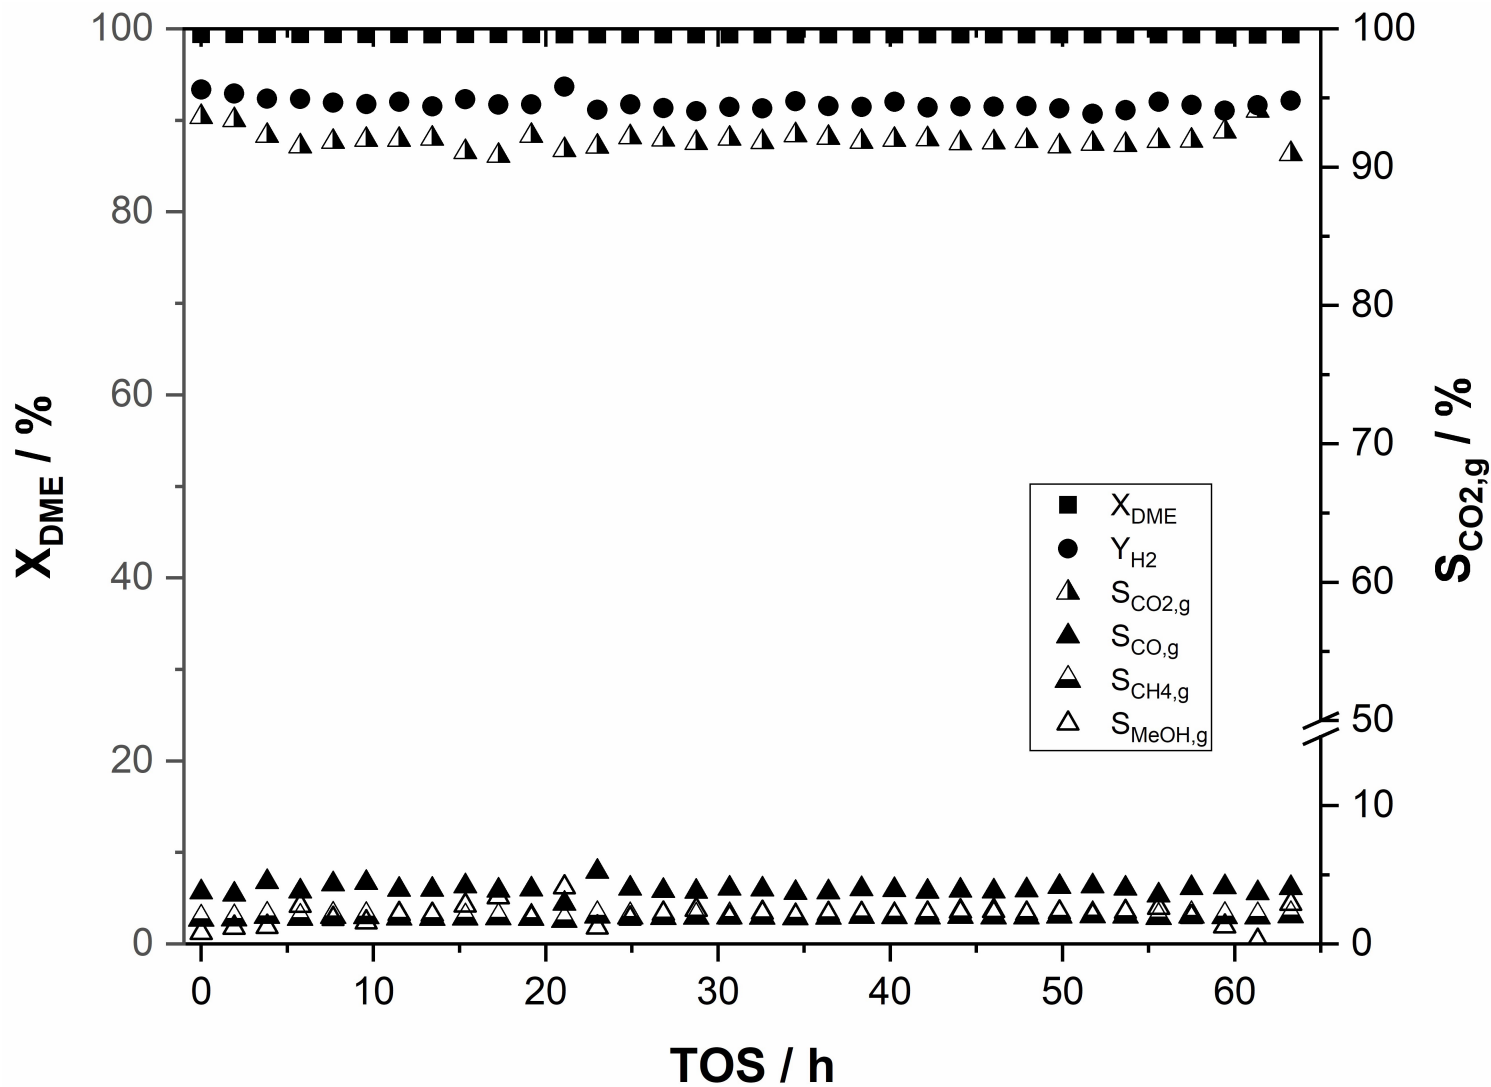

Supplement: d4se00059e3.pdf [file d4se00059e3.pdf]

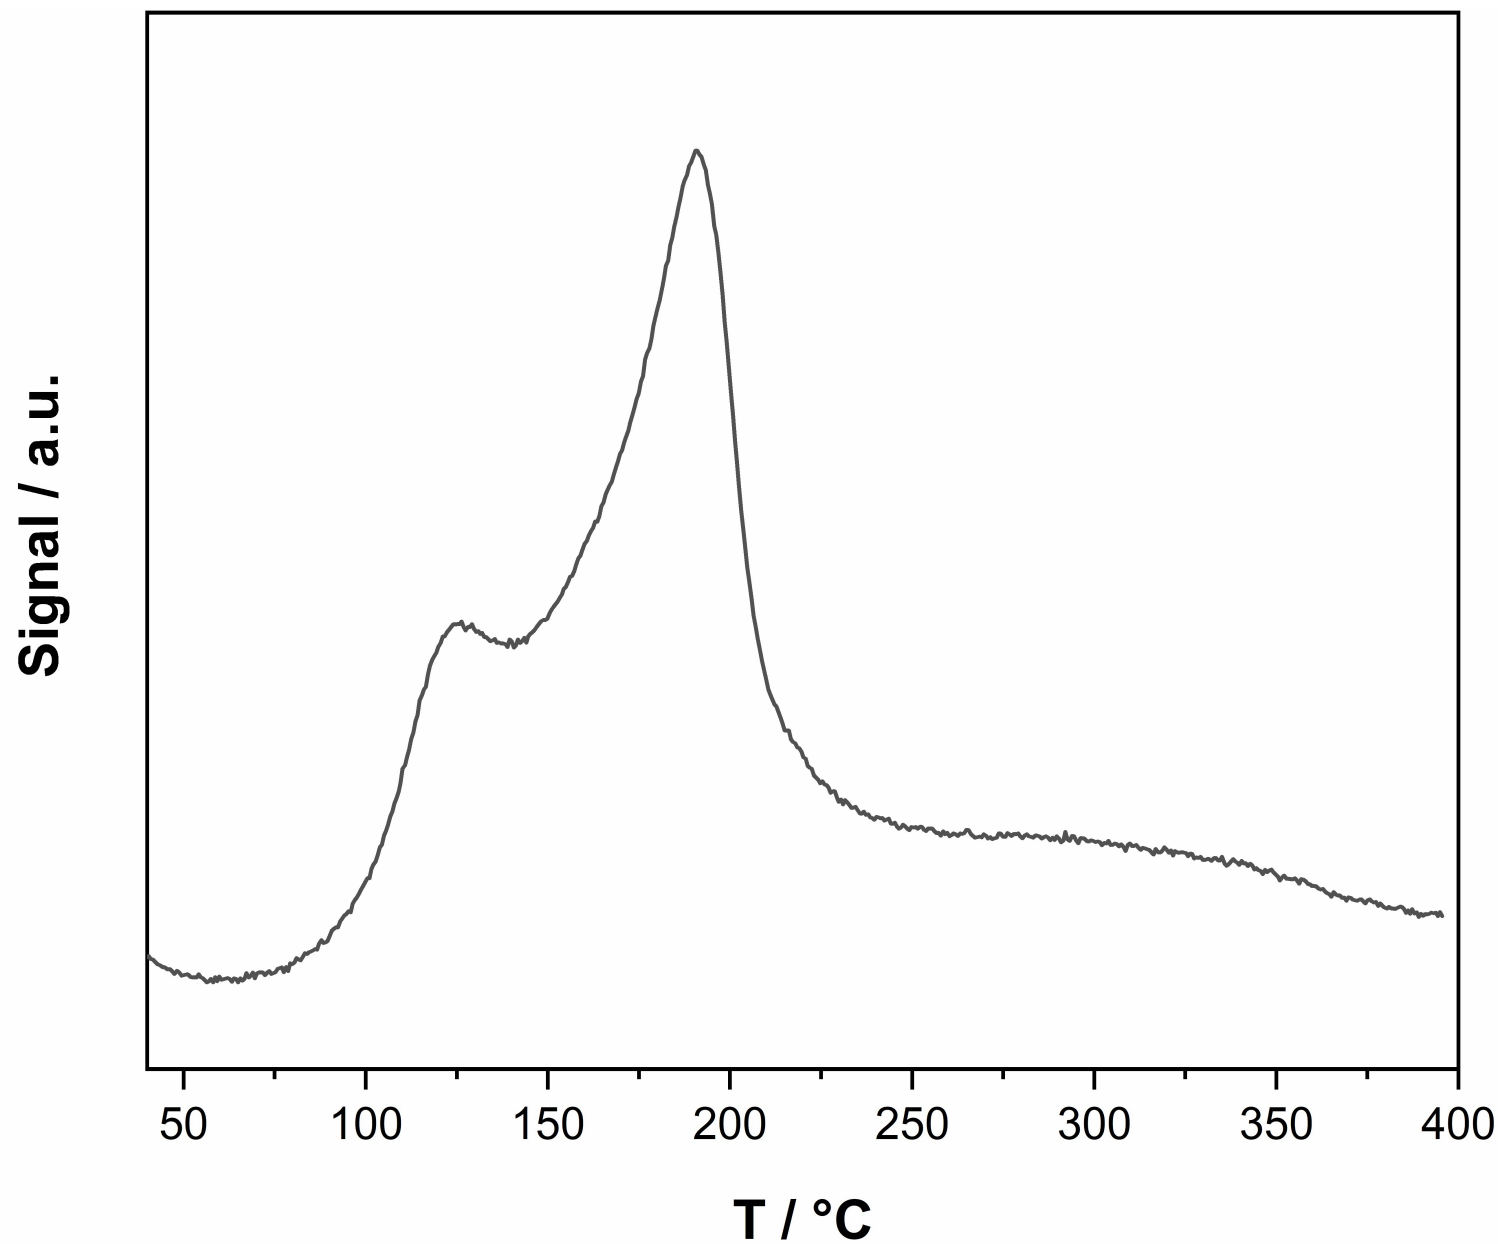

Supplement: d4se00059e4.pdf [file d4se00059e4.pdf]

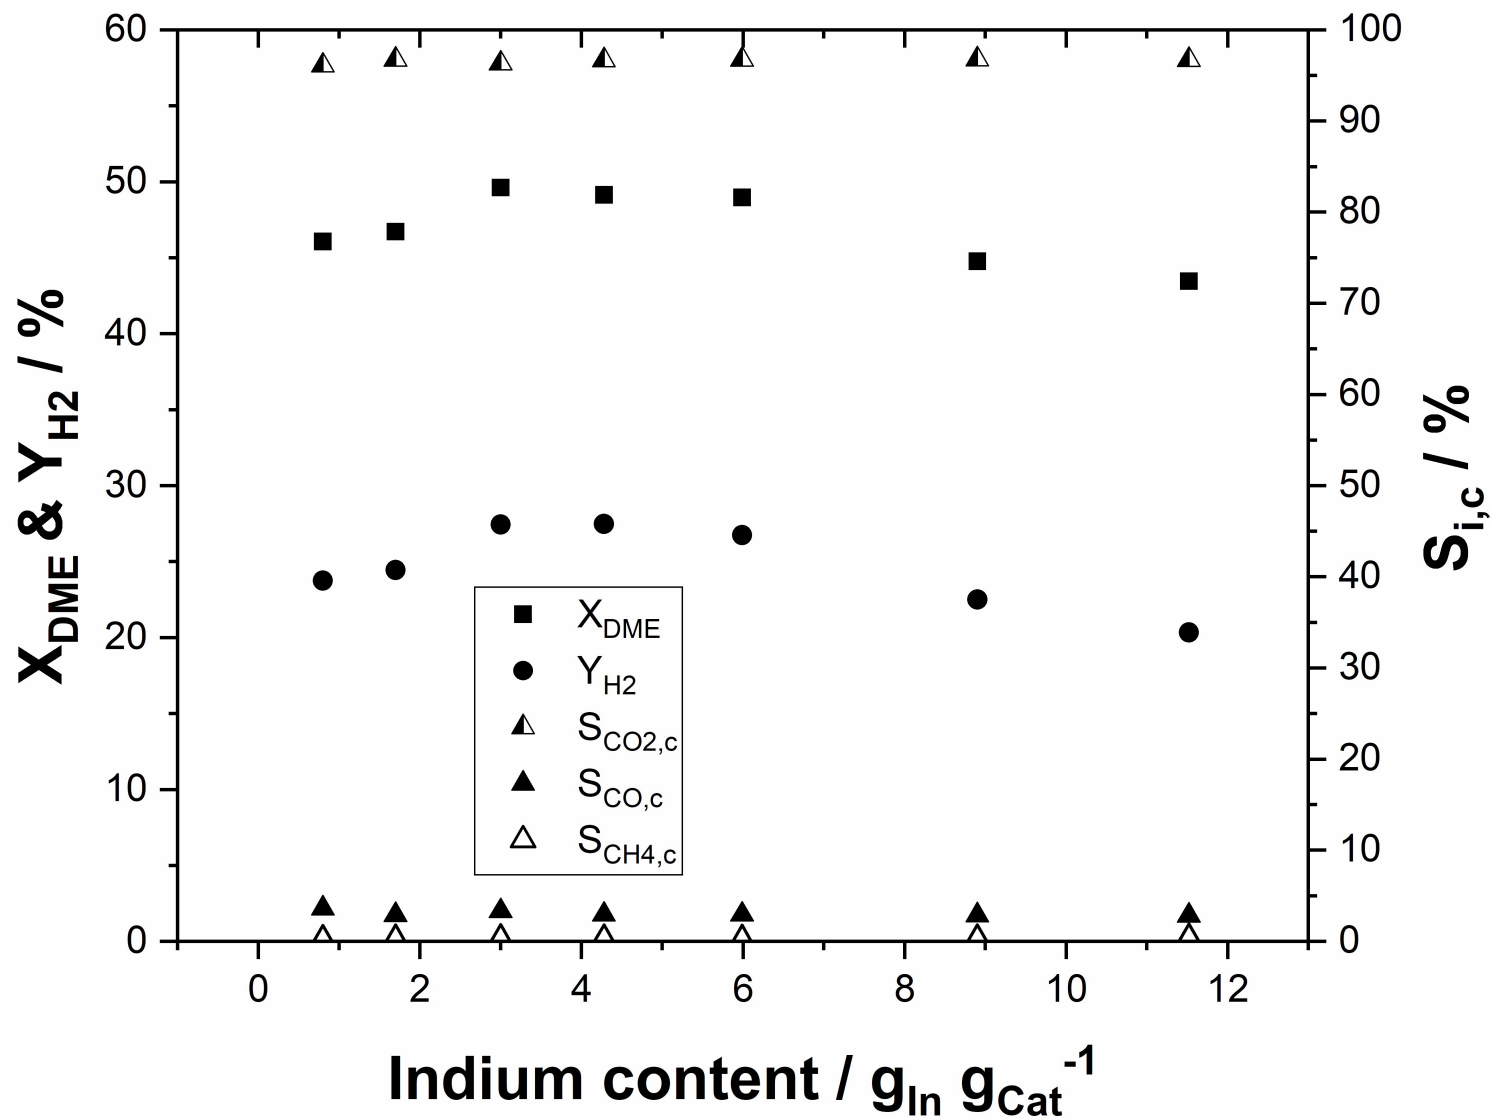

Supplement: d4se00059e6.pdf [file d4se00059e6.pdf]

### Cu/ZnO/Al<sub>2</sub>O<sub>3</sub>

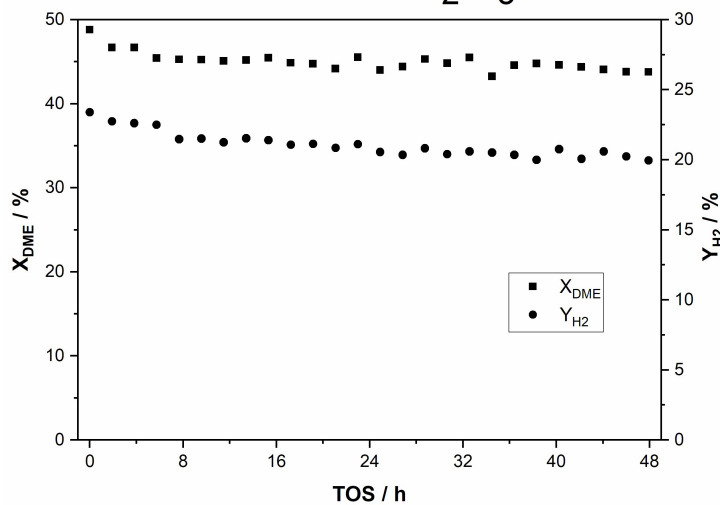

### PdZn/Al<sub>2</sub>O<sub>3</sub>

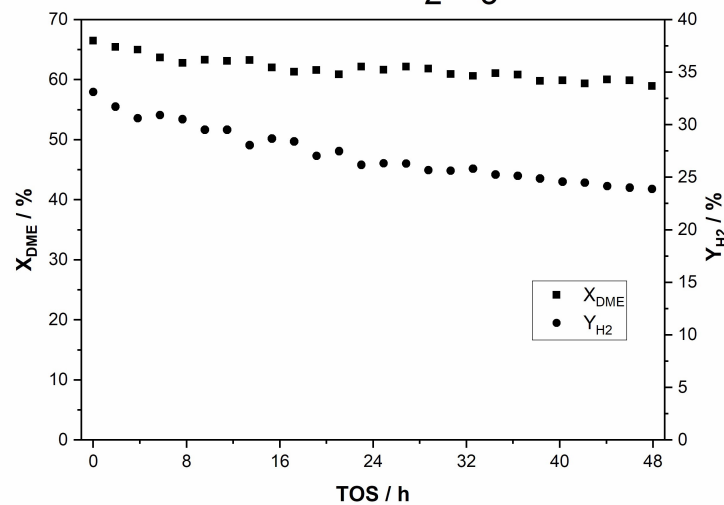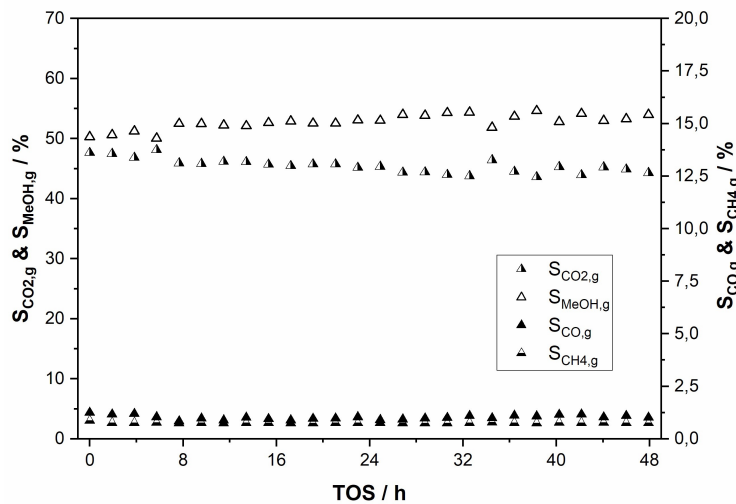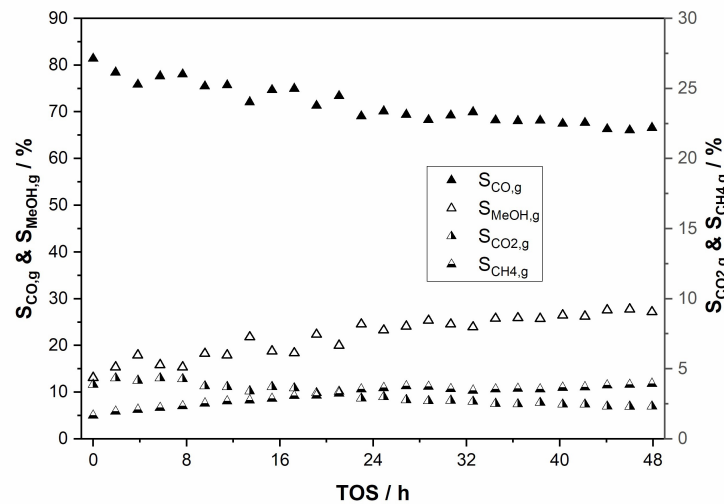

Supplement: d4se00059e9.pdf [file d4se00059e9.pdf]
